# Supplementary material
Source: PubMed Central journal article supplement (PMC4730584)
Supplement: IAI.01046-15_zii999091565so1.pdf [file IAI.01046-15_zii999091565so1.pdf]

1 **SUPPORTING INFORMATION**

2 **Table S1. *C. neoformans* strains used in this study.**

| <b>Strain</b>                                                     | <b>Additional information</b>                                                                                                                                     | <b>Reference</b> |
|-------------------------------------------------------------------|-------------------------------------------------------------------------------------------------------------------------------------------------------------------|------------------|
| RC2-wt (smooth phenotype)                                         | Serotype D, Switch variant <i>MAT<math>\alpha</math></i>                                                                                                          | (1)              |
| H99                                                               | Serotype A, <i>MAT<math>\alpha</math></i>                                                                                                                         | (2)              |
| RC2- <i>all2</i> $\Delta$                                         | <i>all2</i> $\Delta$ :: <i>NEO</i>                                                                                                                                | This study       |
| RC2- <i>all2</i> $\Delta$ +P <sub><i>ACT1</i></sub> - <i>ALL2</i> | <i>ALL2</i> promoter replaced with <i>ACT1</i> promoter to generate P <sub><i>ACT1</i></sub> - <i>ALL2</i> - <i>NAT</i> and inserted to RC2- <i>all2</i> $\Delta$ | This study       |
| H99- <i>all2</i> $\Delta$                                         | <i>all2</i> $\Delta$ :: <i>NEO</i>                                                                                                                                | This study       |
| H99- <i>all2</i> $\Delta$ +P <sub><i>ACT1</i></sub> - <i>ALL2</i> | <i>ALL2</i> promoter replaced with <i>ACT1</i> promoter to generate P <sub><i>ACT1</i></sub> - <i>ALL2</i> - <i>NAT</i> and inserted to H99- <i>all2</i> $\Delta$ | This study       |
| RC2- <i>all1</i> $\Delta$ <i>all2</i> $\Delta$                    | <i>all2</i> $\Delta$ :: <i>NEO</i> <i>all1</i> $\Delta$ :: <i>NAT</i>                                                                                             | This study       |
| RC2- <i>ALL1</i> ::HA                                             | <i>ALL1</i> tagged with HA at C-terminal                                                                                                                          | This study       |

3

4 **Table S2**  
 5 **Primers used in this study.** Primers were designed using the Primer3 software  
 6 package (<http://frodo.wi.mit.edu/primer3/>) for generating gene-deletion cassettes, gene-  
 7 reconstitution cassettes, or real-time PCR products.  
 8

| Primer                                              | Sequence (5'-3')                                                                                | Function/ restriction site                                   |
|-----------------------------------------------------|-------------------------------------------------------------------------------------------------|--------------------------------------------------------------|
| All2-UpF                                            | <u>CCATAGATTGG</u> -<br>AGAAGAAGGGAGACGCAGCT                                                    | <i>ALL2</i> gene knock out<br>cassette/ <i>Van911</i>        |
| All2-UpR                                            | <u>CCATCATTGG</u> -<br>GTTTGGTTCTGAAGTTGATATGTGGT                                               |                                                              |
| All2-DwnF                                           | <u>CCATTTCTTGG</u> -<br>CTGCCTAAGAAGTAGTTTGCCATAT                                               | <i>ALL2</i> gene knock out<br>cassette/ <i>Van911</i>        |
| All2-DwnR                                           | <u>CCATAAATTGG</u> -<br>ATGGCTCACCAGGAAGAACGA                                                   |                                                              |
| All2-GF                                             | <u>CATATGTCTACTGTTACTCAAGGTGTT</u><br>AAGGA                                                     | <i>ALL2</i> gene reconstitution/ <i>NdeI</i>                 |
| All2-GR                                             | <u>CTCGAGCGGGGATGTGATCTGTTTTTC</u>                                                              | <i>ALL2</i> gene reconstitution/ <i>XhoI</i>                 |
| ACT1-PF                                             | <u>TCTAGAAGGCTGCGGGAGGTGAGCT</u>                                                                | <i>ACT1</i> promoter for gene<br>reconstitution/ <i>XbaI</i> |
| ACT1-PR                                             | <u>CATATGAGACATGTTGGGCGAGTTTTA</u><br>C                                                         | <i>ACT1</i> promoter for gene<br>reconstitution/ <i>NdeI</i> |
| ACT1-RT-f<br>ACT1-RT-r                              | (3)                                                                                             | Real time PCR actin                                          |
| All1-RT-f<br>All1-RT-r                              | (3)                                                                                             | Real time PCR <i>ALL1</i>                                    |
| All2-RTF<br>All2-RTR                                | TGAAAGAAGGCCTCAAGAGCG<br>AGTGGAAGCGGCATTGGTT                                                    | Real time PCR <i>ALL2</i>                                    |
| ALL1prom-<br>XbaI-F                                 | <u>TCTAGAAGGTTTGGGGTTGATTTCGAA</u><br>GCT                                                       | <i>ALL1::HA</i>                                              |
| ALL1-HA<br>NCOI-rev                                 | <u>CCATGGTTAAGCGTAGTCTGGGACGT</u><br>CGTATGGGTAAAGAGCCTGGGTCTTG<br>CTG                          |                                                              |
| ALL1-3UTR-<br>For-NCOI<br>ALL1-3UTR-<br>ECORV       | <u>CCATGGAAGAATGTGTAGTAGTTTATG</u><br>GTATCTGAAGGTTAAAG<br><u>GATATCGTGC</u> ACTGAACCACAAGCTC   | <i>ALL1::HA</i>                                              |
| All2For-NHEI<br>All2Rev-PSTI                        | <u>GCTAGCAGGCTGCGGGAGGTGAGCT</u><br>G<br><u>CTGCAGGGCAGTAGGAACTTCCTTAG</u><br>TGGA              | <i>ALL2-mCherry</i>                                          |
| P <sub>Act</sub> -XbaFor<br>mcherry rev-<br>ECORV   | <u>TCTAGAAGGCTGCGGGAGGTGAGCTG</u><br><u>GATATCTTACTTGTAGAGCTCGTCCAT</u><br>ACCAC                | <i>ALL2-mCherry</i><br><i>ALL2-mCherry</i>                   |
| All2 3'UTR-for-<br>ECORV<br>All2 3'UTR-<br>Rev XHOI | <u>GATATCGAAGTAGTTTGCCATATATTT</u><br>TTTGTCTTGGGG<br><u>CTCGAGTTCATCGTGC</u> GTCTTCACT<br>TACT | <i>ALL2-mCherry</i>                                          |

11 **Table S3. Expression levels of *ALL2* as determined by real time PCR in mutants.**

| <b>Sample</b>                                                                           | <b>- Δ C<sub>T</sub></b> | <b>2<sup>-ΔCT</sup></b> | <b>2<sup>-Δ ΔCT</sup></b> |
|-----------------------------------------------------------------------------------------|--------------------------|-------------------------|---------------------------|
| <i>ALL2</i> expression relative to reference gene – <i>ACT1</i>                         |                          |                         |                           |
| RC2 wt                                                                                  | 3.6                      | 0.07745                 |                           |
|                                                                                         | 15.1                     | 0.00003                 | 0.00037                   |
| <i>all2Δ</i>                                                                            |                          |                         |                           |
|                                                                                         | 14.8                     | 0.00003                 | 0.00043                   |
| <i>all1Δall2Δ</i>                                                                       |                          |                         |                           |
| <i>ALL2</i> expression in reconstituted strain relative to reference gene – <i>ACT1</i> |                          |                         |                           |
| RC2-wt                                                                                  | 3.4                      | 0.094732                |                           |
| <i>all2Δ</i> +P <sub>ACT1</sub> - <i>ALL2</i>                                           | 3.9                      | 0.066986                | 1.01942                   |
| <i>ALL1</i> expression relative to reference gene – <i>ACT1</i>                         |                          |                         |                           |
| RC2-wt                                                                                  | 2.6                      | 0.16348                 |                           |
|                                                                                         | 15.5                     | 0.00002                 | 0.00013                   |
| <i>all1Δall2Δ</i>                                                                       |                          |                         |                           |

12

13 **Table S4. Characteristics of *ALL2* null mutant in H99 background.**

| Characteristic                                           | H99              | H99- <i>all2</i> $\Delta$ | H99- <i>all2</i> $\Delta$ +P <sub>ACT1</sub> - <i>ALL2</i> |
|----------------------------------------------------------|------------------|---------------------------|------------------------------------------------------------|
| Exo-polysaccharide viscosity (mL/g)                      | 3238 $\pm$ 432.6 | 1958 $\pm$ 413.3          | 3512 $\pm$ 426.2                                           |
| H <sub>2</sub> O <sub>2</sub> sensitivity zone size (mm) | 63               | 69                        | 62                                                         |
| Phagocytosis index (%)                                   | 131.1 $\pm$ 55.8 | 101.8 $\pm$ 28.3          | 113.2 $\pm$ 20.3                                           |

14

15 To generate H99-*all2* $\Delta$ , the coding region of *ALL2* (945bp) in H99 was replaced with a  
 16 neomycin resistance marker by homologous recombination as described in Materials  
 17 and Methods. The exo-polysaccharide viscosity, H<sub>2</sub>O<sub>2</sub> sensitivity and phagocytosis  
 18 index for H99, H99-*all2* $\Delta$ , and H99-*all2* $\Delta$ +P<sub>ACT1</sub>-*ALL2* were measured using similar  
 19 methods described for RC2.

20 **Figure S1. All1p and All2p are homologous to fungi that affect plants.**  
 21 Both All1p and All2p exhibit up to 33-38% homology with hypothetical proteins in other  
 22 non-encapsulated fungi that are pathogenic to plants, but no homology to any fungi that  
 23 that are pathogenic to humans.

24  
 25 All1p alignment tree

26

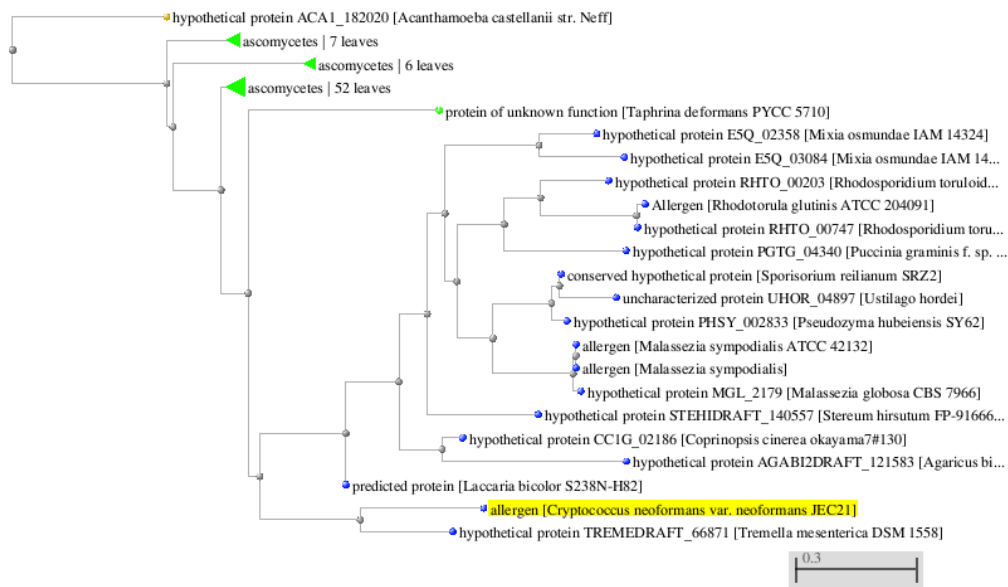

27

28 All2p alignment tree

29

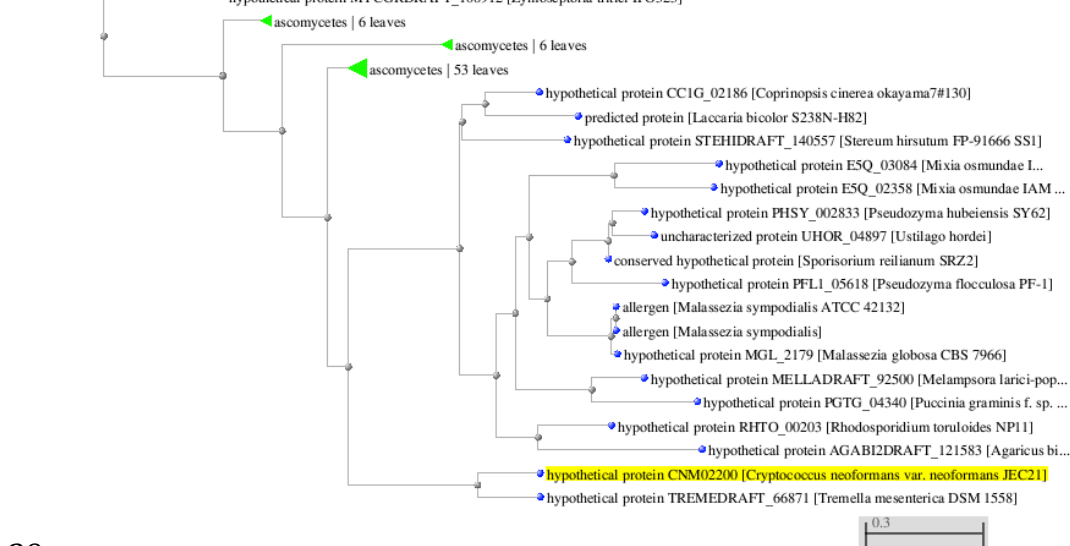

30

31

31 **Figure S2. Validation of the *ALL2* gene disruption and complementation done by**  
32 **PCR.**

33 **(A)** PCR Confirmation of the disruption of *ALL2* gene with the *NEO* disruption cassette.  
34 Lane 1: 1kb DNA marker, Lane 2: PCR amplification using primers All2homo-F and  
35 All2homo-R using RC2 genomic DNA yielded 3000 bp PCR product, Lane 3: PCR  
36 amplification using primers All2homo-F and All2homo-R using *all1Δall2Δ* genomic DNA  
37 yielded 4000 bp PCR product, Lane 4: PCR amplification using primers All1homo-F and  
38 All1homo-R using RC2 genomic DNA yielded 3000 bp PCR product, Lane 5: PCR  
39 amplification using primers All1homo-F and All1homo-R using *all1Δall2Δ* genomic DNA  
40 yielded 4000bp PCR product, Lane 6: 1kb DNA marker, Lane 7: PCR amplification  
41 using primers All2homo-F and All2homo-R using WT genomic DNA yielded 3000bp  
42 PCR product, Lane 8: PCR amplification using primers All2homo-F and All2homo-R  
43 using *all2Δ* genomic DNA yielded 4000bp PCR product. **(B)** PCR confirmation of  
44 insertion of a copy of *ALL2* under Actin promoter to generate *all2Δ*+P<sub>ACT1</sub>-*ALL2*.

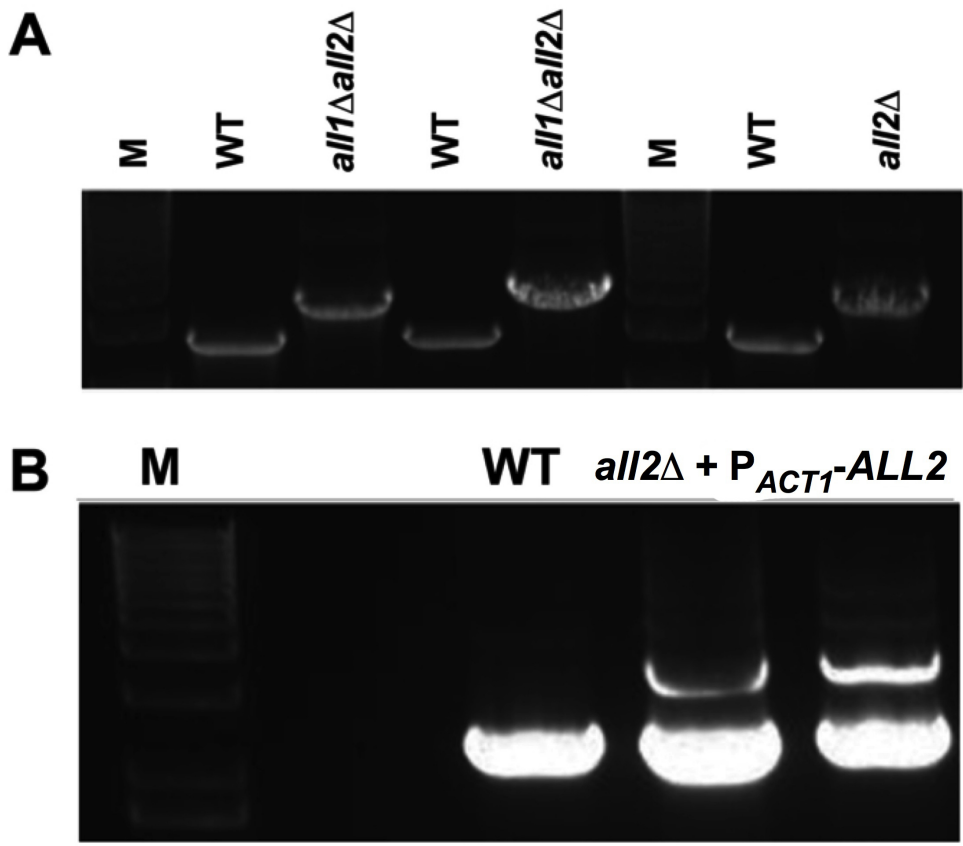

46 **Figure S3. All1-mCherry Cells recovered from murine tissue displayed All2p**  
47 **localization (red) in vacuoles.**  
48

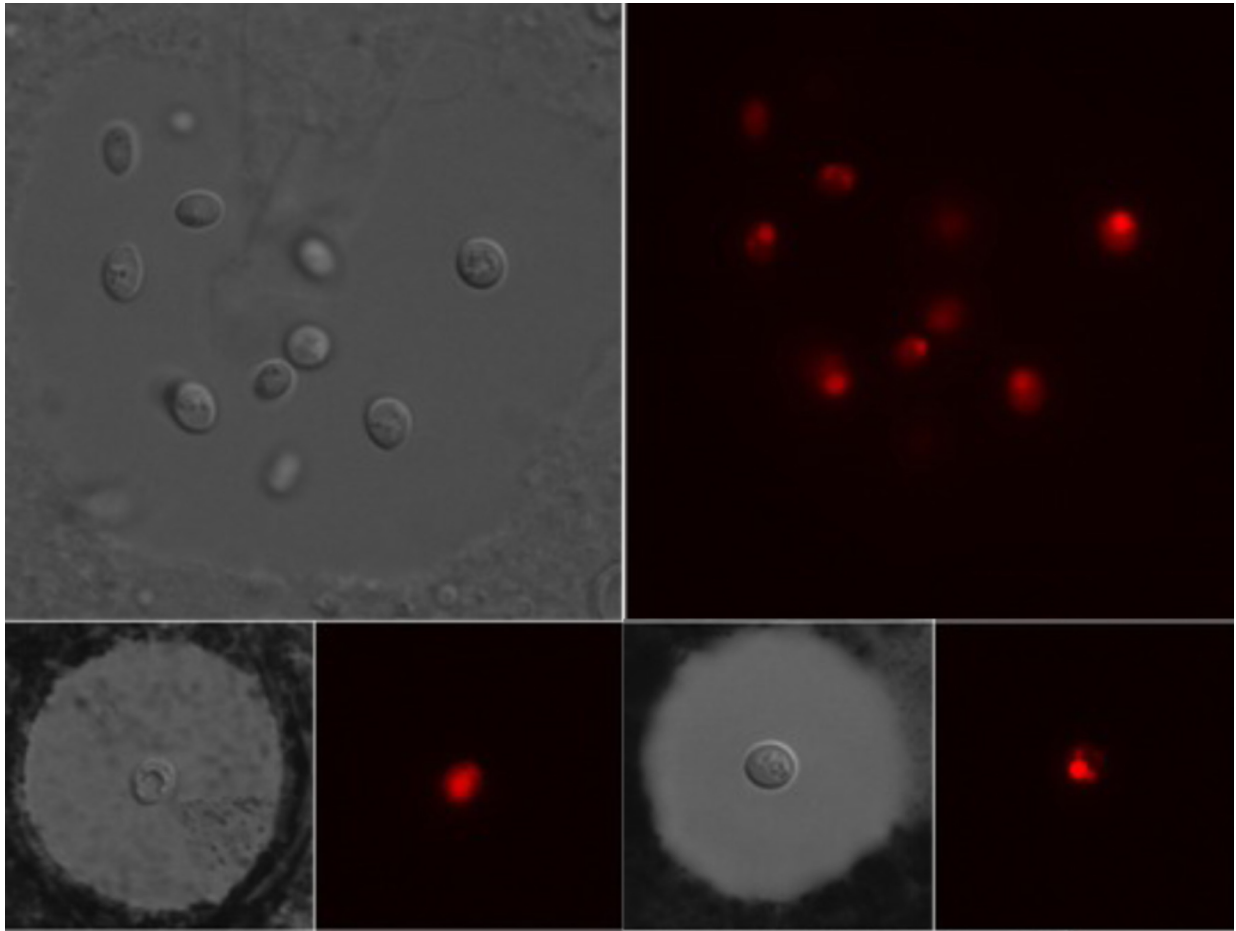

49  
50

**Figure S4. Functional network map of genes regulated by *ALL2*.**

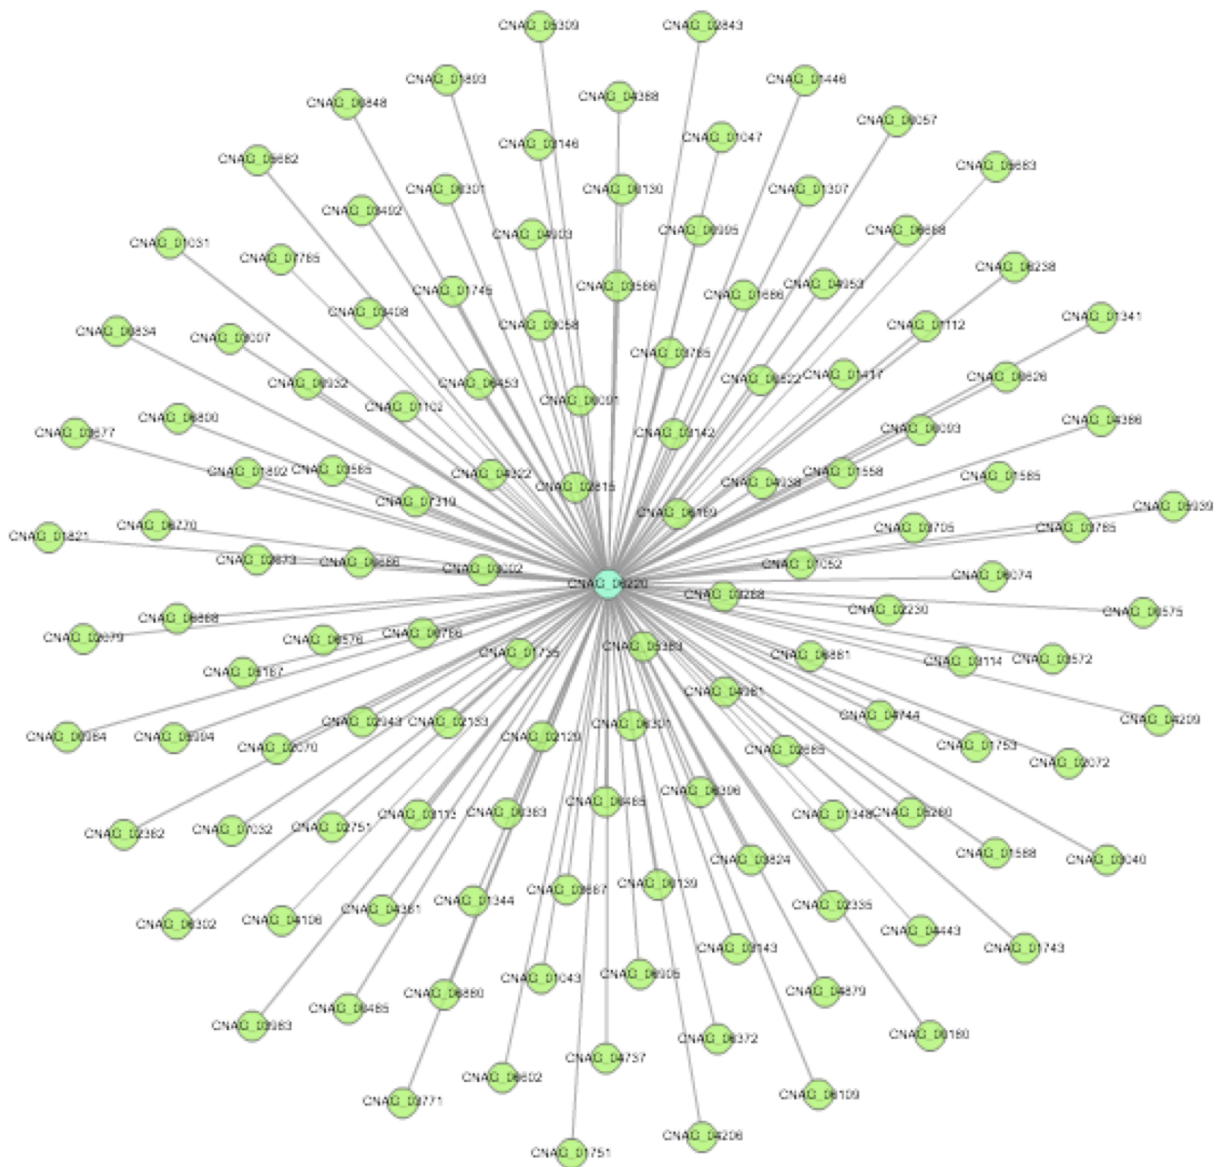



51 **References**

- 52 1. **Fries BC, Taborda CP, Serfass E, Casadevall A.** 2001. Phenotypic switching of  
53 *Cryptococcus neoformans* occurs in vivo and influences the outcome of infection.  
54 *J Clin Invest* **108**:1639-1648.
- 55 2. **Perfect JR, Lang SD, Durack DT.** 1980. Chronic cryptococcal meningitis: a new  
56 experimental model in rabbits. *Am J Pathol* **101**:177-194.
- 57 3. **Jain N, Li L, Hsueh YP, Guerrero A, Heitman J, Goldman DL, Fries BC.** 2009.  
58 Loss of allergen 1 confers a hypervirulent phenotype that resembles mucoid  
59 switch variants of *Cryptococcus neoformans*. *Infect Immun* **77**:128-140.  
60
